# Supplementary material
Source: PubMed Central journal article supplement (PMC7092503)

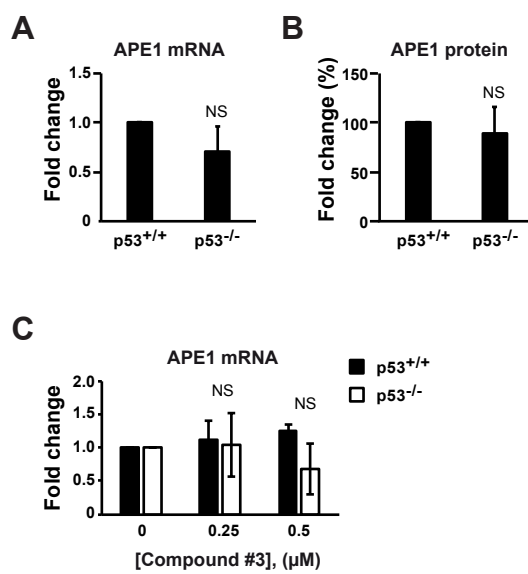

Supplement: NIHMS1057956-supplement-Fig__S1.pdf [file NIHMS1057956-supplement-Fig__S1.pdf]

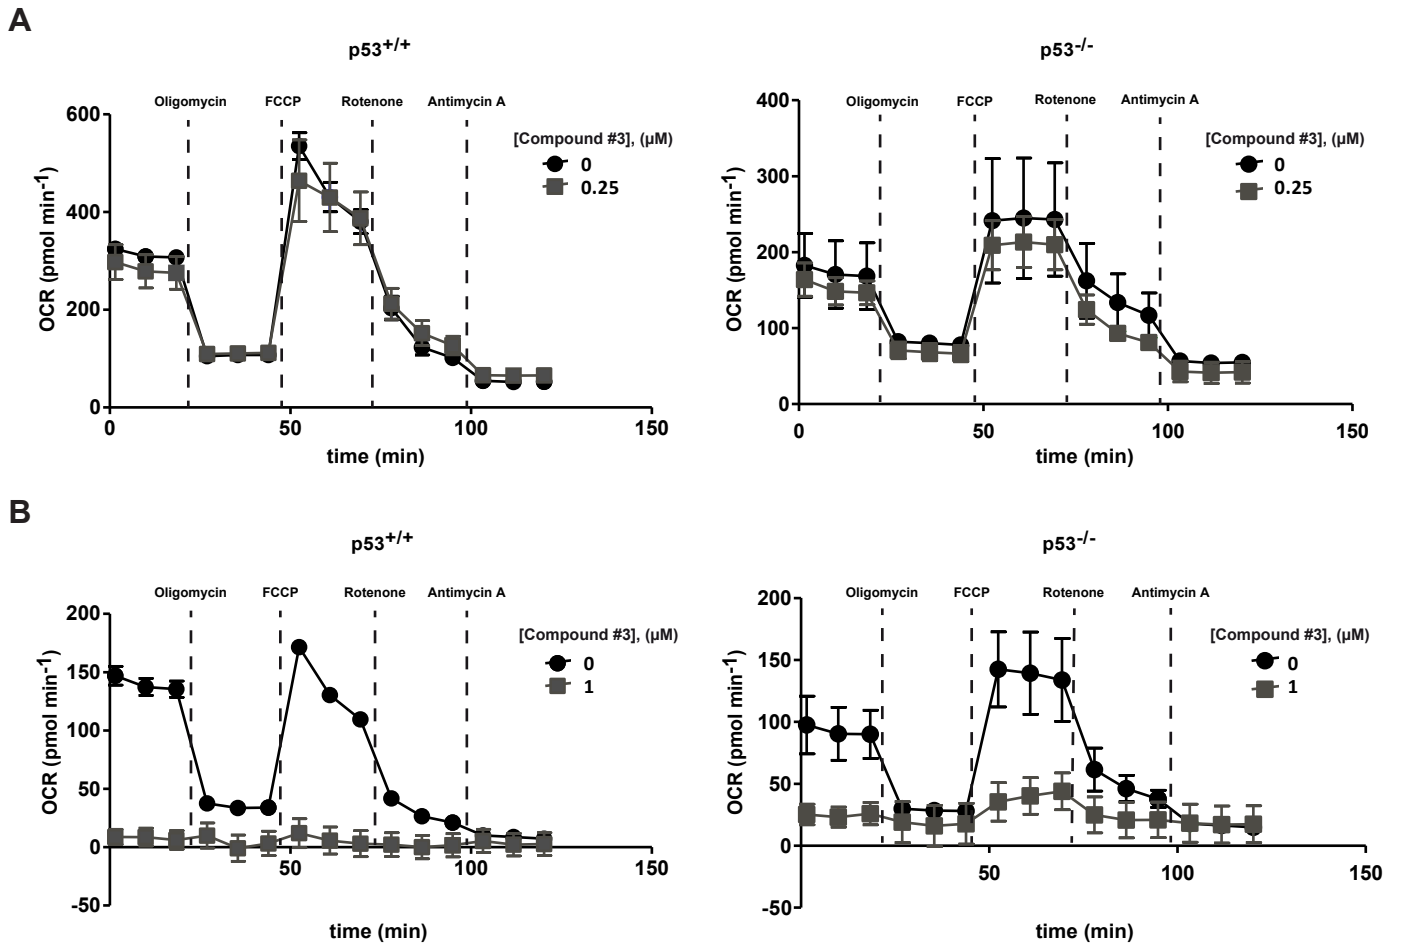

Supplement: NIHMS1057956-supplement-Fig__S2.pdf [file NIHMS1057956-supplement-Fig__S2.pdf]
